# Supplementary material for: A ratiometric fluorescent probe for the detection of β-galactosidase and its application
Source: Royal Society of Chemistry journal article supplement (doi:10.1039/d1ra00739d), 2021-01-01

## **A ratiometric fluorescent probe for the detection of $\beta$ -galactosidase and its application**

**Yanan Li, Bing Deng, Haitao Chen\*, Shaoxiang Yang\*, and Baoguo Sun**

*Beijing Key laboratory of Flavor Chemistry, Beijing Technology and Business University, Beijing 100048, China*

\* E-mail: [chenht@th.btbu.edu.cn](mailto:chenht@th.btbu.edu.cn); [yangshaoxiang@th.btbu.edu.cn](mailto:yangshaoxiang@th.btbu.edu.cn)

| <b>TABLE OF CONTENTS</b>                                     | <b>PAGE</b> |
|--------------------------------------------------------------|-------------|
| <b>S1. <math>^1\text{H}</math> NMR spectra of Probe 1</b>    | <b>2</b>    |
| <b>S2. <math>^{13}\text{C}</math> NMR spectra of Probe 1</b> | <b>2</b>    |
| <b>S3. HRMS spectra of Probe 1</b>                           | <b>3</b>    |
| <b>S4. HPLC spectra of Probe 1+<math>\beta</math>-gal</b>    | <b>4</b>    |
| <b>S5. MS spectra of Probe 1+<math>\beta</math>-gal</b>      | <b>4</b>    |
| <b>S6. Photograph of kiwi (ripe) and kiwi (unripe)</b>       | <b>5</b>    |

**S1.  $^1\text{H}$  NMR spectra of Probe 1**

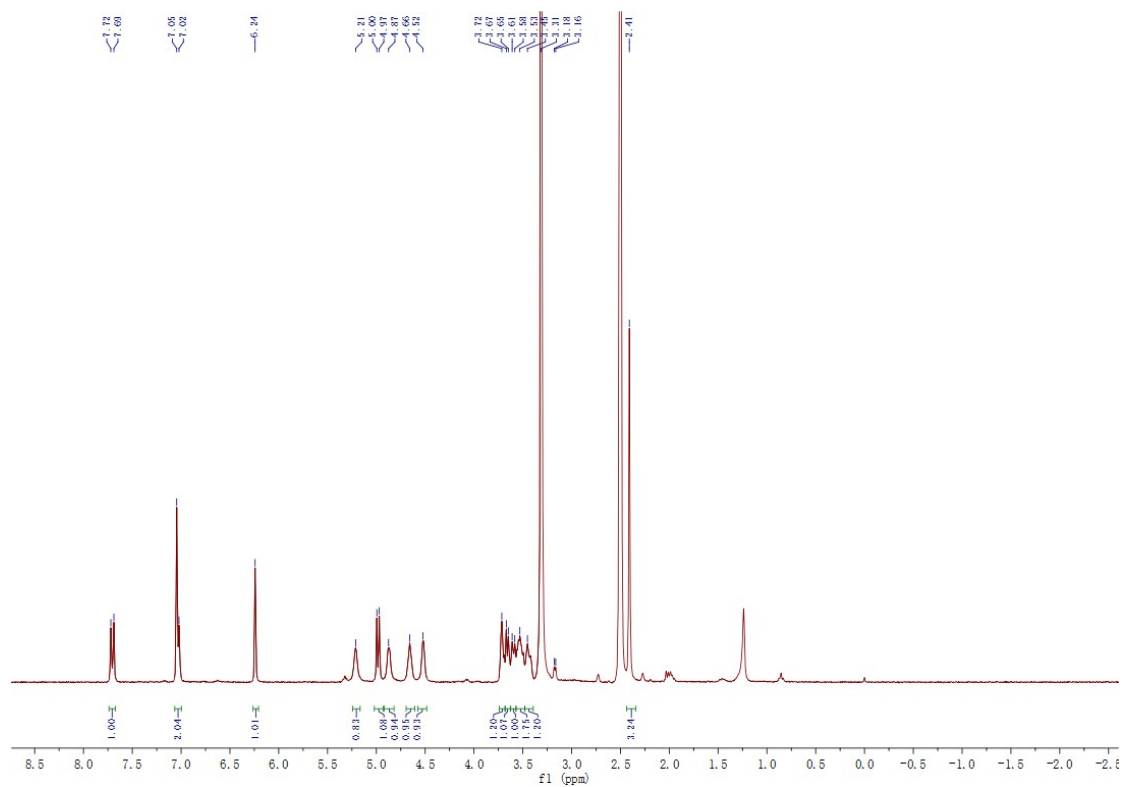

## S2. <sup>13</sup>C NMR spectra of Probe 1

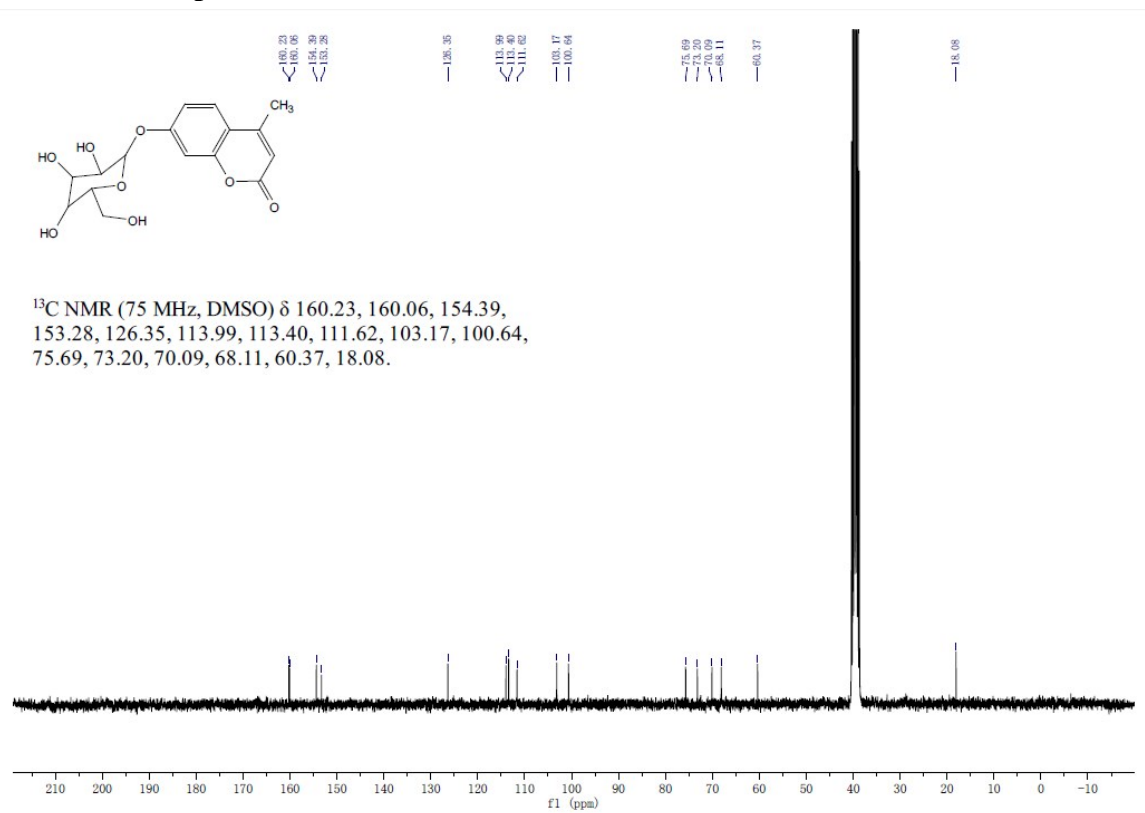

## S3. HRMS spectra of Probe 1

# ESI(N),T32,20190702

**Analysis Info** Acquisition Date 7/2/2019 11:10:28 AM  
 Analysis Name D:\Data\ESI\2019\2019-07\0702\T32\_000001.d  
 Sample Name T32 Instrument solariX

**Acquisition Parameter**  
 Polarity Negative Acquired Scans 20  
 Broadband Low Mass 57.7 m/z Broadband High Mass 450.0 m/z

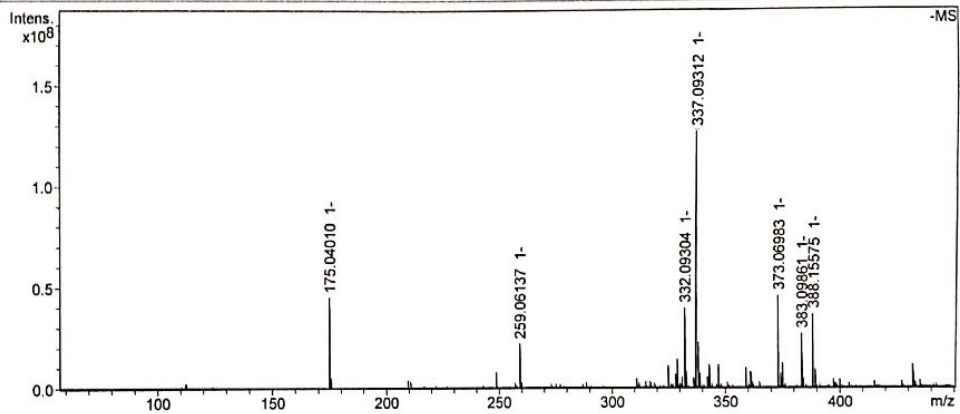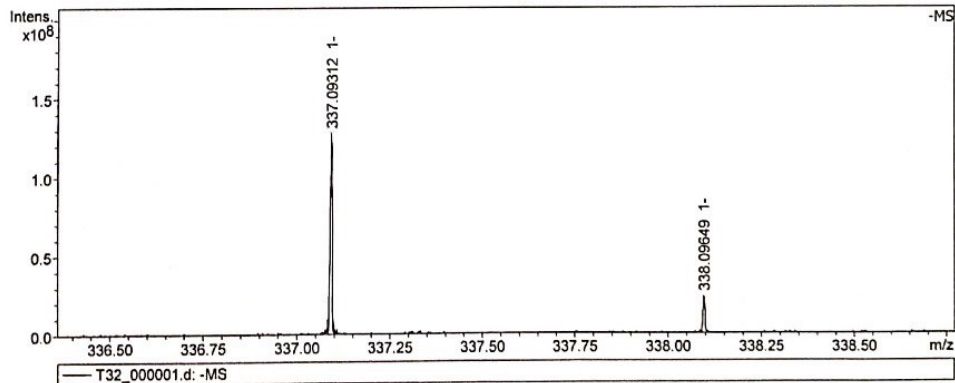

| Meas. m/z  | # | Ion Formula                                    | Score  | m/z        | err [ppm] | Mean err [ppm] | mSigma | rdb | e <sup>-</sup> Conf | N-Rule |
|------------|---|------------------------------------------------|--------|------------|-----------|----------------|--------|-----|---------------------|--------|
| 337.093115 | 1 | C <sub>16</sub> H <sub>17</sub> O <sub>8</sub> | 100.00 | 337.092891 | -0.7      | -0.6           | 9.5    | 8.5 | even                | ok     |

## S4. HPLC spectra of Probe 1+β-gal

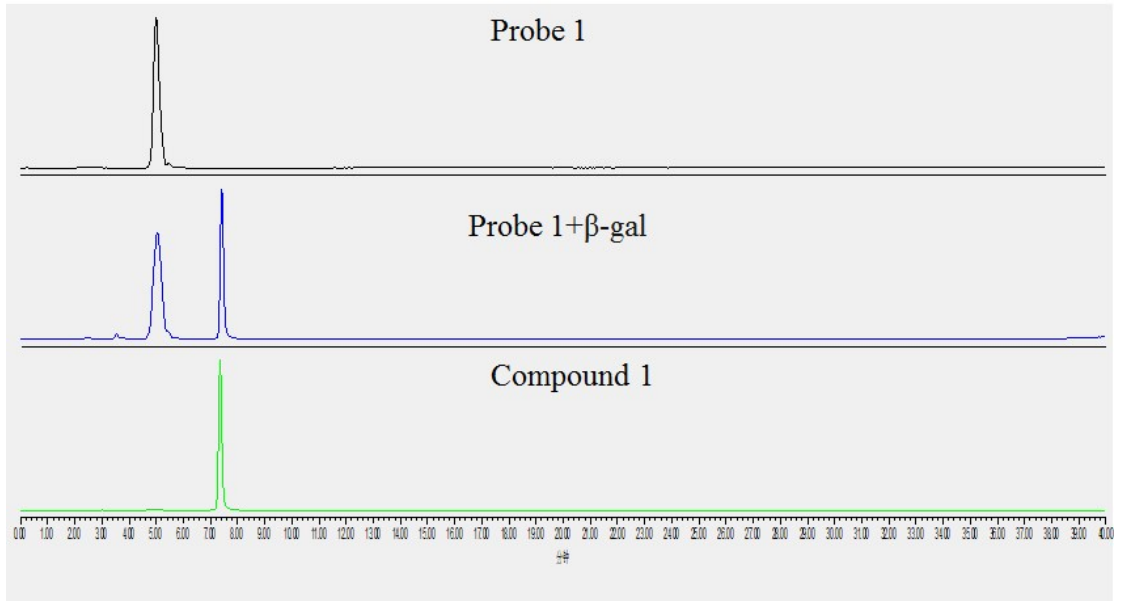

### S5. MS spectra of Probe 1+β-gal

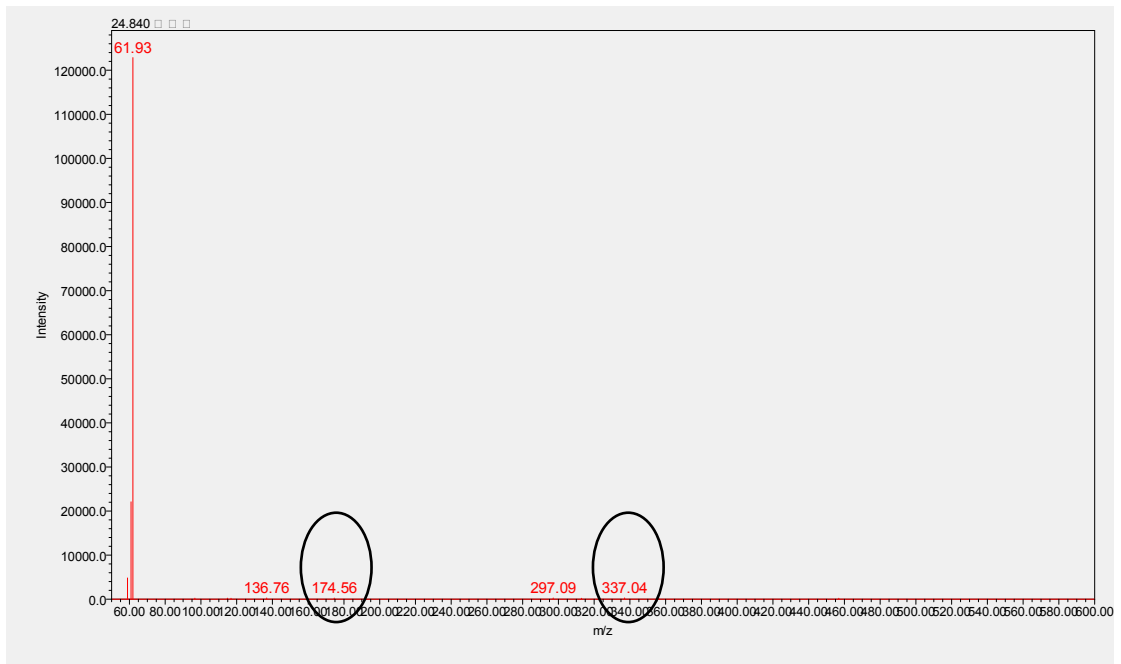

### S6. Photograph of kiwi (ripe) and kiwi (unripe)

kiwi (unripe)

kiwi (ripe)

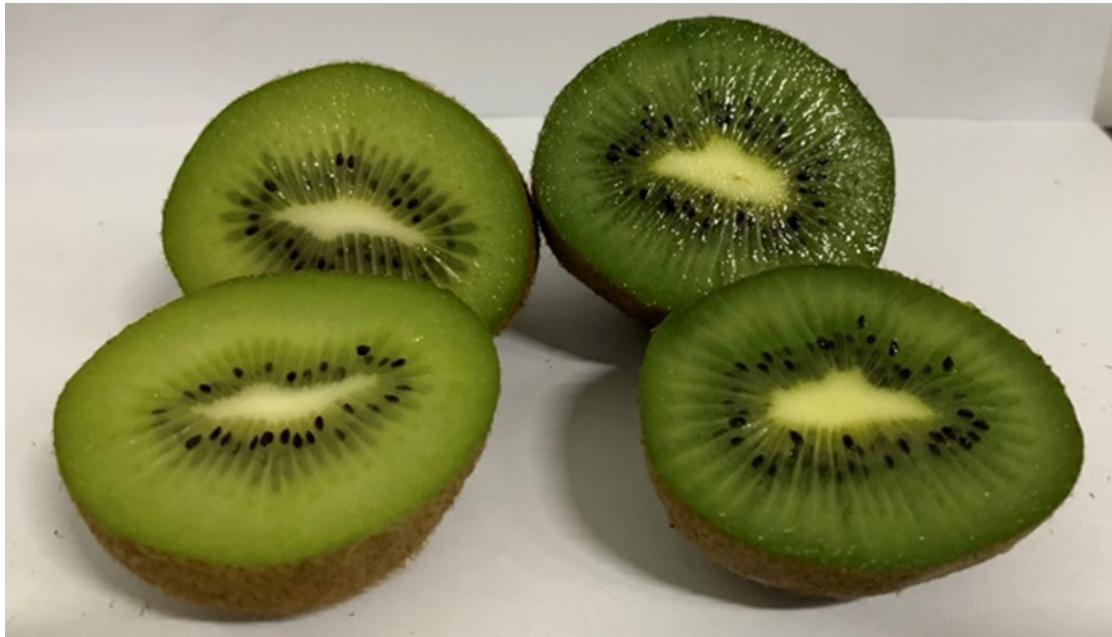

Supplement: d1ra00739d1.pdf [file d1ra00739d1.pdf]
